# Supplementary material for: Genetic deletion of osteopontin in TRAMP mice skews prostate carcinogenesis from adenocarcinoma to aggressive human-like neuroendocrine cancers
Source: PubMed Central journal article supplement (PMC4826179; doi:10.18632/oncotarget.6678), 2015-12-19
Supplement: oncotarget-07-3905-s001.pdf [file oncotarget-07-3905-s001.pdf]

## SUPPLEMENTARY FIGURES AND TABLES

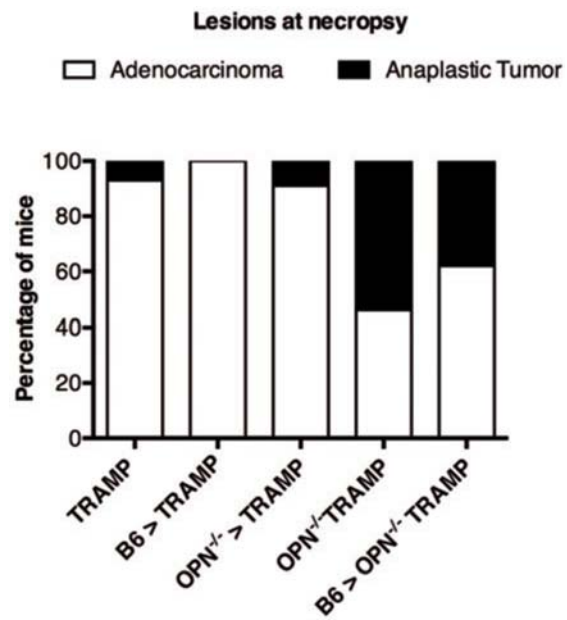

**Supplementary Figure S1: OPN replacement in bone marrow derived cells does not change NE tumor frequency.** Frequency of prostatic lesions in TRAMP and OPN<sup>-/-</sup>TRAMP either untreated, or irradiated (1200 RAD) and transplanted with 10<sup>6</sup> bone marrow (BM) cells from C56BL6 (B6) or OPN<sup>-/-</sup> donors and sacrificed at 30 wks of age.

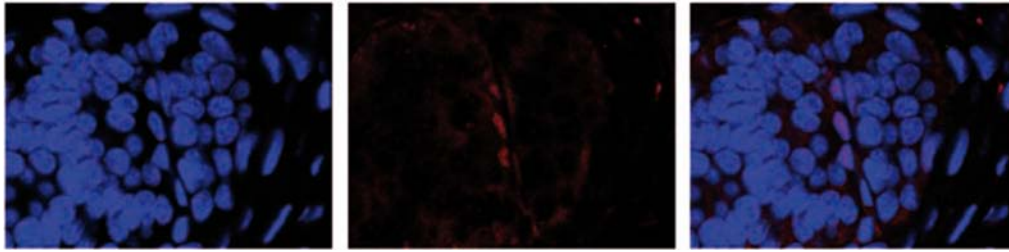

**Supplementary Figure S2: Wild type prostates have nuclear p63.** Representative immunofluorescence staining showing p63 (red) in prostate of C57BL/6 mice. Blue: dapi.

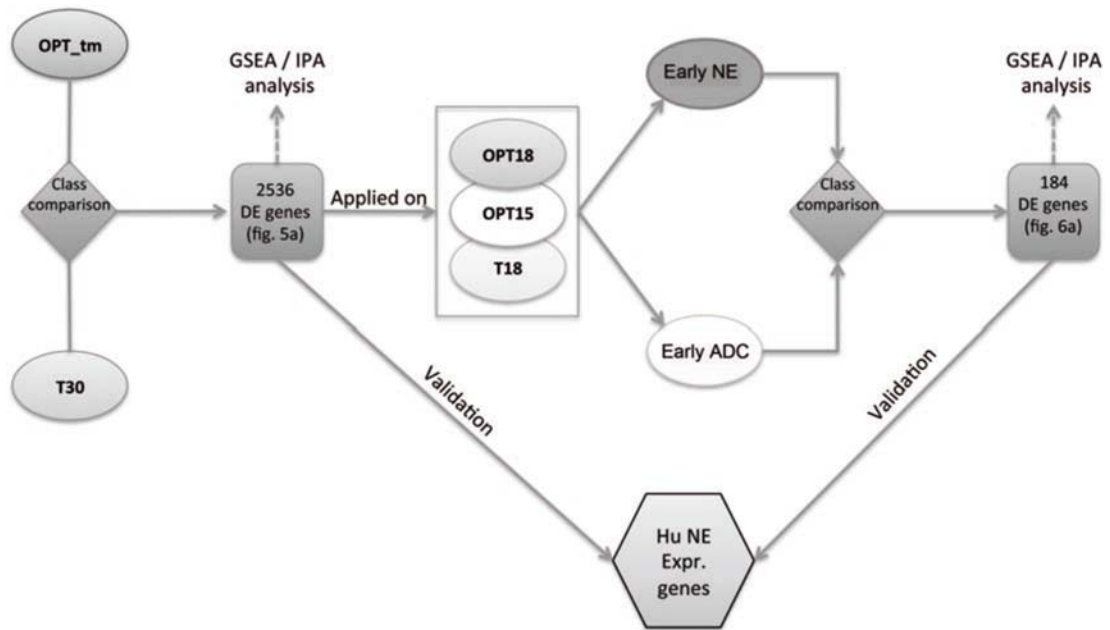

**Supplementary Figure S3: Gene expression analysis.** Flow chart of exploited Class Comparisons and subsequent analyses of microarray data performed on prostates samples of TRAMP and  $OPN^{-/-}$ TRAMP mice.

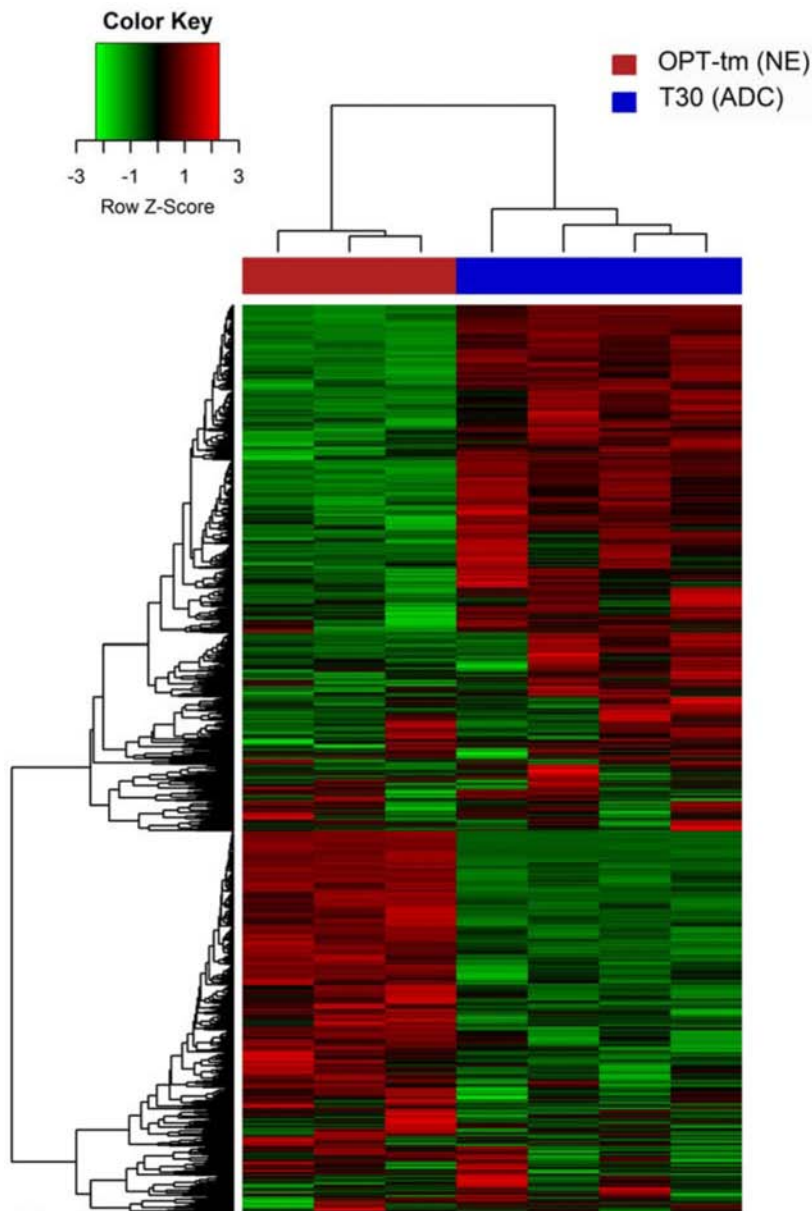

**Supplementary Figure S4: Unsupervised hierarchical clustering of gene expression comparing TRAMP versus  $OPN^{-/-}$  TRAMP tumors.** Unsupervised hierarchical clustering of gene expression profiles obtained from adenocarcinoma (ADC) arising in TRAMP mice of 30 weeks of age (T30) versus NE tumors arising in  $OPN^{-/-}$  TRAMP mice (OPT-tm), using the first 5000 most variable genes according to interquartile range. Dendrogram of samples shows a clear separation between mice with adenocarcinoma from those with a NE tumor.



**Supplementary Table S1: Prostates samples of TRAMP and OPN<sup>-/-</sup>TRAMP mice used for microarray analysis**

| Chip_ref.     | ID mouse      | Nick  | Genotype                 | Age (weeks) | Phenotype          |
|---------------|---------------|-------|--------------------------|-------------|--------------------|
| X4700266073_F | OPT15_2956    | OPT15 | OPN <sup>-/-</sup> TRAMP | 15          | Undetectable tumor |
| X4700266115_F | OPT15_2957    | OPT15 | OPN <sup>-/-</sup> TRAMP | 15          | Undetectable tumor |
| X4700266084_F | OPT15_2962    | OPT15 | OPN <sup>-/-</sup> TRAMP | 15          | Undetectable tumor |
| X4700266109_E | OPT15_3020    | OPT15 | OPN <sup>-/-</sup> TRAMP | 15          | Undetectable tumor |
| X4700266109_F | OPT15_3022    | OPT15 | OPN <sup>-/-</sup> TRAMP | 15          | Undetectable tumor |
| X4700266073_A | OPT18_1327    | OPT18 | OPN <sup>-/-</sup> TRAMP | 18          | Undetectable tumor |
| X4700266073_B | OPT18_1328    | OPT18 | OPN <sup>-/-</sup> TRAMP | 18          | Undetectable tumor |
| X4700266073_C | OPT18_1329    | OPT18 | OPN <sup>-/-</sup> TRAMP | 18          | Undetectable tumor |
| X4700266073_D | OPT18_1330    | OPT18 | OPN <sup>-/-</sup> TRAMP | 18          | Undetectable tumor |
| X4700266115_B | OPT18_443     | OPT18 | OPN <sup>-/-</sup> TRAMP | 18          | Undetectable tumor |
| X4700266115_C | OPT18_1322    | OPT18 | OPN <sup>-/-</sup> TRAMP | 18          | Undetectable tumor |
| X4700266115_D | OPT18_450     | OPT18 | OPN <sup>-/-</sup> TRAMP | 18          | Undetectable tumor |
| X4700266115_E | OPT18_1339    | OPT18 | OPN <sup>-/-</sup> TRAMP | 18          | Undetectable tumor |
| X4700266084_A | OPT18_1325    | OPT18 | OPN <sup>-/-</sup> TRAMP | 18          | Undetectable tumor |
| X4700266084_B | OPT18_444     | OPT18 | OPN <sup>-/-</sup> TRAMP | 18          | Undetectable tumor |
| X4700266084_C | OPT18_2967    | OPT18 | OPN <sup>-/-</sup> TRAMP | 18          | Undetectable tumor |
| X4700266084_D | OPT18_1336    | OPT18 | OPN <sup>-/-</sup> TRAMP | 18          | Undetectable tumor |
| X4700266109_D | OPT18_1323    | OPT18 | OPN <sup>-/-</sup> TRAMP | 18          | Undetectable tumor |
| X4700266073_E | OPT18_1333_tm | OPTtm | OPN <sup>-/-</sup> TRAMP | 18          | NE                 |
| X4700266084_E | OPT18_1340_tm | OPTtm | OPN <sup>-/-</sup> TRAMP | 18          | NE                 |
| X4700266109_B | OPT18_1335_tm | OPTtm | OPN <sup>-/-</sup> TRAMP | 18          | NE                 |
| X4700266073_H | T18_1545      | T18   | TRAMP                    | 18          | Undetectable tumor |
| X4700266115_H | T18_421       | T18   | TRAMP                    | 18          | Undetectable tumor |
| X4700266084_H | T18_408       | T18   | TRAMP                    | 18          | Undetectable tumor |
| X4700266109_H | T18_1578      | T18   | TRAMP                    | 18          | Undetectable tumor |
| X4700266073_G | T30_6771      | T30   | TRAMP                    | 30          | Adenocarcinoma     |
| X4700266115_G | T30_6768      | T30   | TRAMP                    | 30          | Adenocarcinoma     |
| X4700266084_G | T30_6775      | T30   | TRAMP                    | 30          | Adenocarcinoma     |
| X4700266109_G | T30_6769      | T30   | TRAMP                    | 30          | Adenocarcinoma     |

**Supplementary Table S2: Genes up-regulated in Early NE samples: functional network analysis**

| Top Network                                                                              | Score | Focus Protein | Molecules                                                                                                                                                                                                                                                                                                                                                                                                                                                                                                                                            |
|------------------------------------------------------------------------------------------|-------|---------------|------------------------------------------------------------------------------------------------------------------------------------------------------------------------------------------------------------------------------------------------------------------------------------------------------------------------------------------------------------------------------------------------------------------------------------------------------------------------------------------------------------------------------------------------------|
| Cellular Growth and Proliferation, Neurological Disease, Skeletal and Muscular Disorders | 37    | 23            | Alpha tubulin, <b>AMPH</b> , <b>BDNF</b> , <b>BIRC5</b> , <b>CCNB1</b> , <b>CCNE2</b> , <b>CD1D</b> , <b>CDK5R1</b> , Cg, <b>CHGA</b> , <b>CYP3A4</b> , <b>DPYSL2</b> , E2f, <b>E2F2</b> , <b>ERK</b> , <b>HEY1</b> , <b>HEY2</b> , <b>HIST1H2AB</b> , <b>KIF22</b> , Map4K4, <b>MAPT</b> , <b>MYBL2</b> , <b>NFkB</b> (complex), Notch, P38 MAPK, <b>PBK</b> , <b>PKIA</b> , <b>PPP2R5e</b> , <b>PROX1</b> , <b>RGS4</b> , <b>RRM2</b> , <b>STMN1</b> , <b>TCF4</b> , <b>TRO</b> , tubulin (complex), <b>USP12</b> , <b>ZEB2</b>                    |
| Cellular Assembly and Organization, Cellular Function and Maintenance, Cell Morphology   | 29    | 19            | <b>ABL1</b> , <b>ACKR2</b> , <b>CEBPA</b> , <b>DIDO1</b> , <b>DNER</b> , <b>DPYSL5</b> , <b>EEF1A2</b> , <b>EFNA5</b> , <b>ERK1/2</b> , <b>EXTL2</b> , <b>FOXO1</b> , <b>GRB2</b> , <b>GRIP1</b> , <b>HIST1H2AH</b> , <b>HNRNPA2B1</b> , <b>KIF18A</b> , <b>LMNB1</b> , <b>LRRN1</b> , <b>LY6H</b> , <b>MAP2</b> , <b>NUPR1</b> , <b>PFKFB4</b> , <b>PFN2</b> , <b>PLOD2</b> , <b>RHOA</b> , <b>RIMKLA</b> , <b>RNF144A</b> , <b>SLC32A1</b> , <b>SPAG5</b> , <b>SPC25</b> , <b>SYT1</b> , <b>UBE2I</b> , <b>UHRF2</b> , <b>WASF1</b> , <b>WASF3</b> |
| Nervous System Development and Function, Organ Morphology, Organismal Development        | 20    | 11            | <b>AHI1</b> , <b>BEX1</b> , <b>CACNG5</b> , <b>CHGB</b> , <b>CPLX1</b> , <b>CRMP1</b> , <b>DCX</b> , <b>GAP43</b> , <b>GJD2</b> , <b>HAP1</b> , <b>IGF1</b> , <b>KIF1A</b> , <b>PAK3</b> , <b>PDX1</b> , <b>PPP1R1A</b> , <b>REST</b> , <b>SBDS</b> , <b>SYN1</b>                                                                                                                                                                                                                                                                                    |

**Supplementary Table S3: Genes up-regulated in Early NE samples: top canonical pathways**

| <b>Ingenuity Canonical Pathways</b> | <b>-log(<i>p</i>-value)</b> | <b>Ratio</b> | <b>Molecules</b>                                                      |
|-------------------------------------|-----------------------------|--------------|-----------------------------------------------------------------------|
| Semaphorin Signaling in Neurons     | 3.92                        | 0.0962       | DPYSL2,CRMP1,PAK3,DPYSL4,DPYSL5                                       |
| Axonal Guidance Signaling           | 2.66                        | 0.0259       | DPYSL2,KLC1,TUBA1A,PAK3,EPHB2,BDNF,E<br>FNA5,PFN2,DPYSL5,ROBO1,TUBB2B |
| Notch Signaling                     | 2.31                        | 0.0811       | CNTN1,MFNG,HEY1                                                       |
| Cyclins and Cell Cycle Regulation   | 2.24                        | 0.0519       | MYT1,CCNE2,E2F2,CCNB1                                                 |
| GADD45 Signaling                    | 1.88                        | 0.105        | CCNE2,CCNB1                                                           |



**Supplementary Table S4: Genes overexpressed in human NE tumors enriched in OPT-tm vs T30 comparison: functional network analysis**

| Top Network                                                                     | Score | Focus Protein | Molecules                                                                                                                                                                                                                                                       |
|---------------------------------------------------------------------------------|-------|---------------|-----------------------------------------------------------------------------------------------------------------------------------------------------------------------------------------------------------------------------------------------------------------|
| Cell Cycle, DNA Replication, Recombination, and Repair, Cell Death and Survival | 54    | 31            | <b>CCNA2,CDC6,CDC7,CDT1,Cyclin A,Cyclin E,DTX3, DUSP14,E2f,E2F1,E2F2,FEN1,FOXM1,IL33, MALT1, MCM2,MCM5,MCM7, MCM10, MYBL2,NAMPT,NFkB (complex), NUSAP1, PKMYT1,PLK1,PLK4,PRR11,RRM2 ,SENPI,SKP2,TPX2,TSLP,WDHD1,WDR76,ZC3H12A</b>                               |
| Cell Cycle, DNA Replication, Recombination, and Repair, Cell Death and Survival | 35    | 23            | <b>ASAH1,ASF1B,AURKA,BMP4,BUB1B,C1QTNF9,CDC2 0,CDC42EP5,CDCA5,DUSP4,ENO2,ERK,ERK1/2,Histone h3,Hsp90,IFN Beta,IgG,Interferon alpha,Jnk,LMNB1,MAPK 8IP1,NCAPD2,NTRK3,OAS2,P38 MAPK,PI3K (complex),P RKCH,STK17B,SUV39H1,TCR,TNFRSF13C, TOP2A,UB E2S,Vegf,WT1</b> |
| Cancer, Skeletal and Muscular Disorders, Cell Cycle                             | 23    | 19            | <b>ASPM,AURKB,BLM,CCND1,CD24,CDCA8,CDK4,CENPI, CKAP2L,DPYSL5,DUSP8,E2F8, FOXO1, GLI1,INCENP,K IF23,MAN2B2,NUPR1,PLK1,PSTPIP2,SHCBP1,SPC24,SP C25,SUOX, TGFB1,XRCC2,ZMYM3</b>                                                                                    |
| Cell Cycle, DNA Replication, Recombination, and Repair, Cancer                  | 19    | 21            | <b>AKAP12,ANLN,ANPEP,BRCA1,CCNE2,CD24,CD KN1A,CEBPA,CENPA,CHAF1A,CHAF1B, CLSPN, CNOT6,CNOT6L,CSF2,DEPDC1B,E2F4,EEF1A 2,FEN1, FOXM1,HCAR2,HERC2,IQGAP3, KIA A0101,KIF14,KNTC1,NPAT,ORC1,PLK1,PRC1, PSMA3,RBBP8,SMC4,SRSF2, TOP2A</b>                             |

**Supplementary Table S5: Genes overexpressed in human NE tumors enriched in *Early NE* vs *Early ADC* comparison: functional network analysis**

| Top Network                                                                                | Score | Focus Protein | Molecules                                                                                                                                                                                                                                   |
|--------------------------------------------------------------------------------------------|-------|---------------|---------------------------------------------------------------------------------------------------------------------------------------------------------------------------------------------------------------------------------------------|
| Cancer, Organismal Injury and Abnormalities, Reproductive System Disease                   | 59    | 31            | AURKA,BMP4,BUB1B,CCNA2,CDC6,CDC7,CDC20,CDC A4,CDT1,CENPA,CEP55,Cyclin A, Cyclin E,DUSP14,E2f,E 2F1,E2F2,FOXM1,GTSE1,KIF11,KIF23,LACTB,MCM5,M CM10 ,MYBL2,NFkB (complex),NUSAP1,PLK1,PLK4,PRR 11,RRM2,SKP2,TK1,TPX2,WDR76                    |
| DNA Replication, Recombination, and Repair, Cell Cycle, Cellular Assembly and Organization | 29    | 19            | AKAP12,ASF1B,CDC37L1,CDC42EP5,CDT1 ,Cg,DAZAP1,DUSP3,DUSP14,ENO2,ERK1/2, ESM1,FKBP4,FSH,Histone h3,Hsp90,IGFBP5,Interferon alpha,Lh ,MAP3K5,MAPK8IP1,NCAPD2,P38 MAPK,PRKCH,RAB27A,SMC2, SMC4,SRD5A2,STIP1,SUV 39H1,TK1,TLK1,TOP2A,WDHD1,YBX3 |
| Hematological System Development and Function, Hematopoiesis, Tissue Development           | 25    | 17            | AGTR1,ANPEP,AP3B2,BMP4,CEBPA,CENPF,CHAF1B,CN OT6,CNOT6L,CSF2,EEF1A2,ESPL1, FLT1,G3BP1,GAB1,GI PC2,GNG4,GRB2,HAMP,HNRNP,ILF2,ILF3,L3MBTL3,L HX2,MAP1B,mir-181,NANOG,NKX2-2,RAD51AP1,RRAS,S EMA3A,SP1,SYP,TGFB1, TOP2A                        |
| DNA Replication, Recombination, and Repair, Cell Cycle, Cell Morphology                    | 21    | 15            | ASPM,ATR,BRCA1,BRCA2,CCNK,CDCA8,CENPI,CHEK1, CKAP2L,CLSPN,DPYSL5,EIF4G1,FANCD2,HERC2,LMNB1 ,MAN2B2,MBD2,MCM2,miR-483-3p (miRNAs w/seed CACU CCU),MSH2,NBN,NDC80,NUF2,NUPR1,PLK1,RAD51,RFC4 ,RFC5,RNF168,RPA1,RPA2,SHCBP1,SPC24,SPC25,SUOX   |
| DNA Replication, Recombination, and Repair, Cell Cycle, Cancer                             | 21    | 15            | ANLN,C1QTNF9,CALCR,CCNK,CDCA5,CHRNA3,CHRN2 ,DSCC1,DUT,E2F4,ERK,FOXO3,HMMR,IGF1,KIAA0101,Me k,MYBL2,POLA2,POLD1,POLD2,PPP1R13B,PRKAA2,PRKA B1,PRKAG1,RAMP1,RFC3,RPS27L,RRM2,SMC4,SYN1,TIM ELESS, TOP2A,TP53,UBE2T,UNG                        |
| Cell Cycle, Cell Death and Survival, Cancer                                                | 17    | 13            | ALDH1A2,ATF3,BCL2L14,BICD2,BRD4,CD24,CDC25A,CD KN1A,CFTR,CUL1,DEPDC1B,FADS1,H2AFX,IL13,KIF2A,K NTC1,LRPPRC,MANEAL,NAV1,NME1,NR3C1,NRIP1,PCM1 ,PDLIM2,POLR2A,SALL2,STX1A,STXBP1,THBS1, TOP2A,T P53BP2,YWHAG,YWHAQ,YWHAZ,YY1                  |
